# Supplementary material for: High-precision stable isotope measurements of tungsten and molybdenum in single sample aliquots combined with optimized separation for mixed double spikes
Source: Royal Society of Chemistry journal article supplement (doi:10.1039/d4ja00059e), 2024-01-01
Supplement: d4ja00059e1.pdf [file d4ja00059e1.pdf]

## Supporting Information

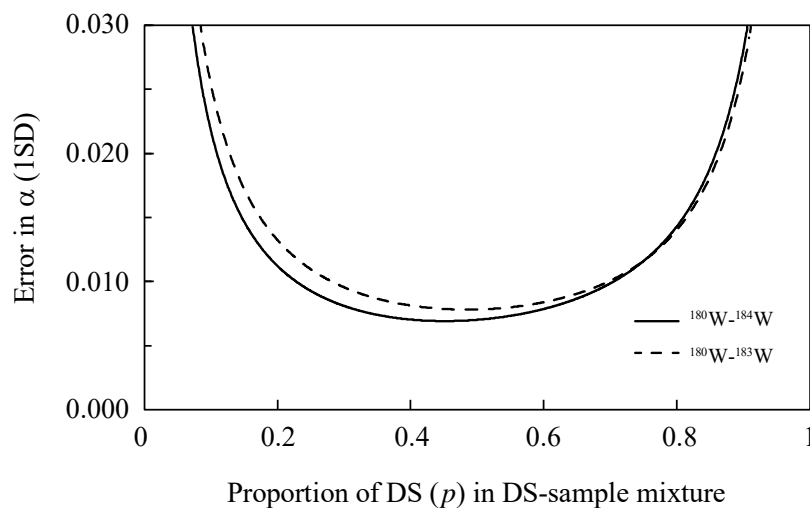

**Figure S1.** Comparison of theoretical errors in the natural fractionation factor ( $\alpha$ ) plotted against the proportion ( $p$ ) of DS in a DS-sample mixture. The two curves denote the results of optimal  $^{180}\text{W}$ - $^{184}\text{W}$  and  $^{180}\text{W}$ - $^{183}\text{W}$  double spikes (both using  $^{180}\text{W}$ - $^{183}\text{W}$ - $^{184}\text{W}$ - $^{186}\text{W}$  inversion), respectively, both from Oak Ridge National Laboratory (ORNL). The ORNL single-spike compositions ( $^{180}\text{W}$ ,  $^{182}\text{W}$ ,  $^{183}\text{W}$ ,  $^{184}\text{W}$ ,  $^{185}\text{W}$ ) are  $^{180}\text{W} = (11.35\%, 42.80\%, 14.80\%, 19.80\%, 11.27\%)$ ,  $^{183}\text{W} = (<0.03\%, 5.51\%, 79.03\%, 13.46\%, 2.00\%)$ , and  $^{184}\text{W} = (<0.05\%, 1.79\%, 1.64\%, 94.64\%, 1.92\%)$ .

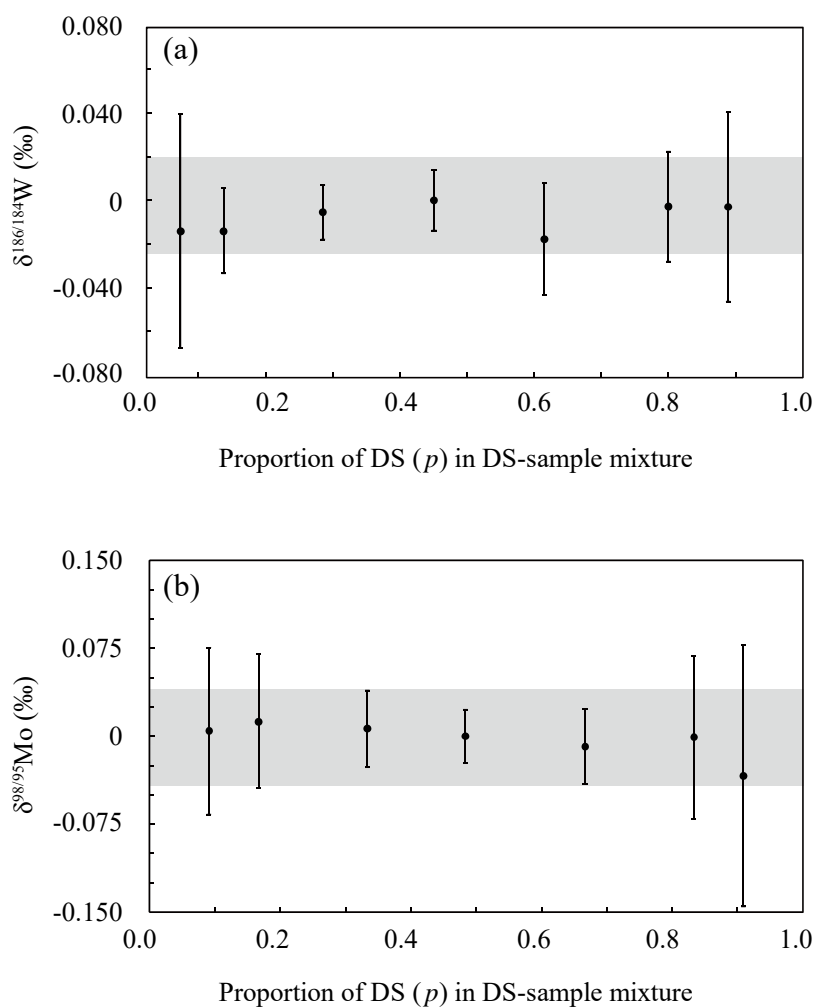

**Figure S2.** (a)  $\delta^{186}\text{W}$  and (b)  $\delta^{98}\text{Mo}$  values of DS-NIST mixtures with variable DS proportions ( $p$ ). Error bars represent 2 SD of individual measurements ( $n = 3$ ). The shaded area shows the external reproducibility of  $\pm 0.03$  (2 SD,  $n = 51$ ) obtained for NIST 3163 solution (W) and  $\pm 0.04$  (2 SD,  $n = 31$ ) for NIST 3134 solution (Mo).

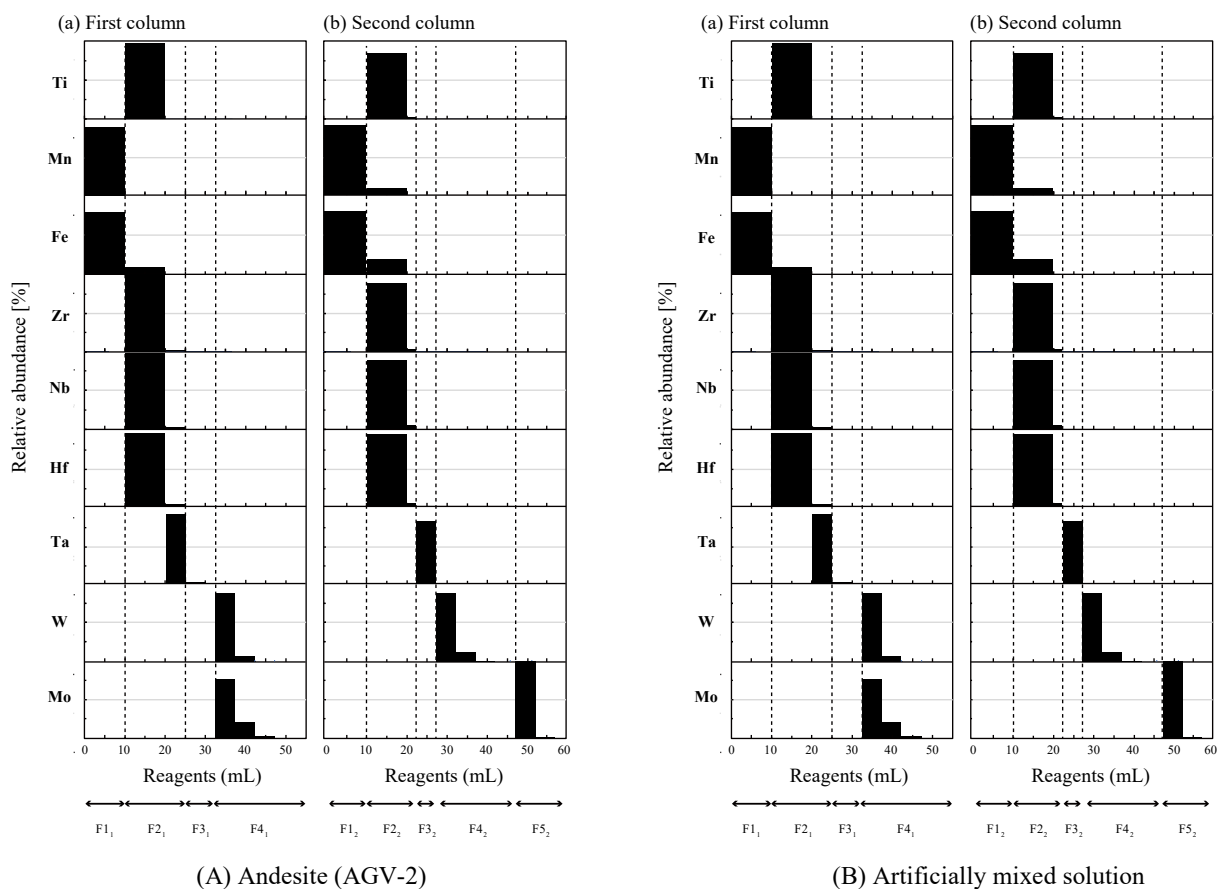

**Figure S3.** Elution profiles using anion exchange resin (AG1-X8) for the solutions of (A) AGV-2 (300 mg) with added interfering elements (1  $\mu\text{g}$  each of Ru and Ta) and (B) artificially mixed solution of single elements (1  $\mu\text{g}$  each of W, Mo, Ti, Mn, Fe, Zr, Nb, Ru, Hf, Ta): (a) the first-column and (b) the second-column procedures. The elution of Ru is not shown because it was removed during digestion and evaporation procedures.

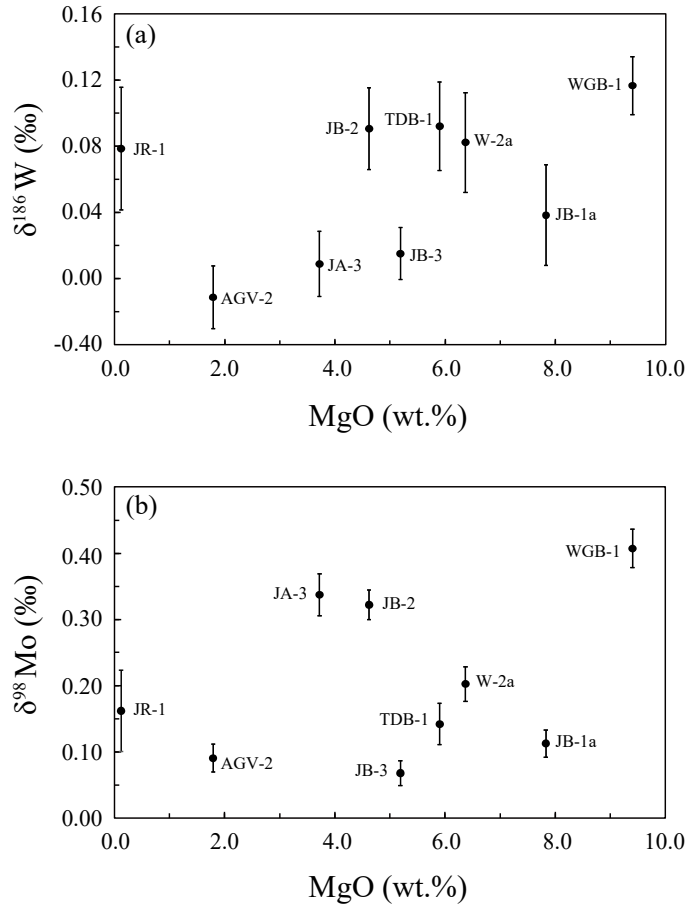

**Figure S4.** (a)  $\delta^{186}\text{W}$  and (b)  $\delta^{98}\text{Mo}$  versus MgO for the geochemical reference materials of igneous rock series analyzed in this study. Error bars are the 2 SD obtained from replicate measurements of samples. MgO contents were obtained from online databases of the providers (USGS, GSJ, and CANMET-CCRMP).  $\delta^{98/95}\text{Mo}$  are normalized relative to NIST 3134 (= 0‰) + 0.25‰.

**Table S1.** Matrix elements in the JMn-1 solution (10 mg) obtained via the first column

|    | Average $\pm$ 2SD <sup>a</sup> (ng) | Residual fraction <sup>b</sup> | X/W     | X/Mo    |
|----|-------------------------------------|--------------------------------|---------|---------|
| Ti | 3.00 $\pm$ 2.58                     | 3.3E-05                        | 6.5E-03 | 8.3E-04 |
| Mn | 1.05 $\pm$ 1.25                     | 4.0E-07                        | 2.7E-03 | 3.5E-04 |
| Fe | 336 $\pm$ 703                       | 3.3E-04                        | 8.6E-01 | 1.1E-01 |
| Zr | 0.10 $\pm$ 0.10                     | 3.0E-05                        | 3.3E-04 | 4.3E-05 |
| Nb | 0.03 $\pm$ 0.19                     | 9.0E-05                        | 8.7E-05 | 1.1E-05 |
| Ru | 0.02 $\pm$ 1.35                     | 9.8E-03                        | 4.0E-05 | 5.2E-06 |
| Hf | 0.003 $\pm$ 0.030                   | 4.5E-05                        | 8.6E-06 | 1.1E-06 |
| Ta | 0.050 $\pm$ 0.049                   | 6.7E-03                        | 1.3E-04 | 1.7E-05 |

**Table S2.** Matrix elements in the purified W and Mo solutions of the JMn-1 (10 mg) after the second column

|    | Purified solution of W              |                                |         | Purified solution of Mo             |                                |         |
|----|-------------------------------------|--------------------------------|---------|-------------------------------------|--------------------------------|---------|
|    | Average $\pm$ 2SD <sup>a</sup> (ng) | Residual fraction <sup>b</sup> | X/W     | Average $\pm$ 2SD <sup>a</sup> (ng) | Residual fraction <sup>b</sup> | X/Mo    |
| Ti | 0.230 $\pm$ 0.086                   | 3.0E-06                        | 6.4E-04 | 0.352 $\pm$ 0.035                   | 4.6E-06                        | 1.3E-04 |
| Mn | Not Detected                        | –                              | <5.4E-4 | Not Detected                        | –                              | <7.2E-5 |
| Fe | 0.261 $\pm$ 1.069                   | 2.5E-07                        | 7.4E-04 | 3.292 $\pm$ 2.079                   | 3.1E-06                        | 1.2E-03 |
| Zr | 0.002 $\pm$ 0.003                   | 4.0E-07                        | 4.8E-06 | 0.003 $\pm$ 0.009                   | 7.1E-07                        | 1.1E-06 |
| Nb | 0.002 $\pm$ 0.001                   | 6.3E-06                        | 6.6E-06 | 0.011 $\pm$ 0.004                   | 2.9E-05                        | 3.9E-06 |
| Ru | 0.005 $\pm$ 0.341                   | 2.7E-03                        | 1.3E-05 | 0.010 $\pm$ 0.692                   | 6.0E-03                        | 3.7E-06 |
| Hf | Not Detected                        | –                              | <1.5E-6 | Not Detected                        | –                              | <2.0E-7 |
| Ta | Not Detected                        | –                              | <5.0E-6 | Not Detected                        | –                              | <6.7E-7 |

<sup>a</sup> 2SD was given by performing the separation procedures in triplicate.

<sup>b</sup> Proportions were calculated using the recommended or preferable data for JMn-1 reported in Imai et al. (1999).

#### Reference list cited in Table 4

1. M. Tsujisaka, S. Takano, M. Murayama and Y. Sohrin, *Anal. Chim. Acta*, 2019, **1091**, 146-159.
2. D. Stubbs, R. Yang, C. D. Coath, T. John and T. Elliott, *Geochim. Cosmochim. Acta*, 2022, **334**, 135-154.
3. N. Krabbe, T. S. Kruijer and T. Kleine, *Chem. Geol.*, 2017, **450**, 135–144.
4. F. Kurzweil, C. Münker, J. Tusch and R. Schoenberg, *Chem. Geol.*, 2018, **476**, 407-417.
5. L. Roué, F. Kurzweil, M. Wille, A. Wegwerth, O. Dellwig, C. Münker and R. Schoenberg, *Geochim. Cosmochim. Acta*, 2021, **309**, 366-387.
6. T. Zhang, J. Liu, Q. Zhang, Y. Zhang and L. Qin, *Geostand. Geoanal. Res.*, 2022, **47**, 169-183.
7. R. Yang, T. Li, D. Stubbs, T. Chen, S. Liu, D. B. Kemp, W. Li, S. Yang, J. Chen, T. Elliott, O. Dellwig, J. Chen and G. Li, *Geochim. Cosmochim. Acta*, 2022, **322**, 227-243.
8. T. Breton and G. Quitt'e, *J. Anal. At. Spectrom.*, 2014, **29**, 2284–2293.
9. K. Abraham, J. Barling, C. Siebert, N. Belshaw, L. Gall and A. N. Halliday, *J. Anal. At. Spectrom.*, 2015, **30**, 2334–2342.
10. P. P. Zhao, J. Li, L. Zhang, Z. B. Wang, D. X. Kong, J. L. Ma, G. J. Wei and J. F. Xu, *Geostand. Geoanal. Res.*, 2016, **40**, 217-226.
11. M. Willbold, K. Hibbert, Y.-J. Lai, H. Freymuth, R. C. Hin, C. Coath, F. Vils and T. Elliott, *Geostand. Geoanal. Res.*, 2016, **40**, 389-403.
12. K. Irisawa and T. Hirata, *J. Anal. At. Spectrom.*, 2006, **21**, 1387.
13. N. Imai, S. Terashima, S. Itoh, and A. Ando, *Geochem. J.*, 1995, **29**, 91-95.
14. S. E. Mazza, A. Stracke, J. B. Gill, J.-I. Kimura and T. Kleine, *Earth Planet. Sci. Lett.*, 2020, **530**, 115942.
15. D. Asael, F. L. Tissot, C. T. Reinhard, O. Rouxel, N. Dauphas, T. W. Lyons, E. Ponzevera, C. Liorzou and S. Chéron, *Chem. Geol.*, 2013, **362**, 193-210.
16. K. T. Goto, G. Shimoda, A. D. Anbar, G. W. Gordon, Y. Harigane, R. Senda and K. Suzuki, *Mar. Geol.*, 2015, **369**, 91-99.
17. J. Li, X. k. Zhu, S. h. Tang and K. Zhang, *Geostand. Geoanal. Res.*, 2016, **40**, 405-415.
18. N. Gaspers, T. Magna and L. Ackerman, *Geostand. Geoanal. Res.*, 2020, **44**, 363-374.
19. T. Goldberg, G. Gordon, G. Izon, C. Archer, C. R. Pearce, J. McManus, A. D. Anbar and M. Rehkämper, *JAAS*, 2013, **28**, 724-735.
20. J. S. Kane, B. Arbogast and J. Leventhal, *Geostand. Newsl.*, 1990, **14**, 169-196.
21. B. Kendall, S. Wang, P. Lillis, L. Xing, W. Zheng and C. Zhu, *Chem. Geol.*, 2023, **617**, 121244.
22. N. Imai, S. Terashima, S. Itoh and A. Ando, *Geostand. Newsl.*, 1996, **20**, 165-216.
23. G. P. Sindol, M. G. Babechuk, J. Conliffé, J. F. Slack, C. Rosca and R. Schoenberg, *Precambrian Res.*, 2022, **379**, 106750.
24. USGS Geochemical and Microanalytical Reference Materials Distribution:

<https://www.usgs.gov/centers/gggsc/science/usgs-geochemical-and-microanalytical-reference-materials-distribution>

25. NRC Digital Repository from National Research Council Canada: <https://nrc-digital-repository.canada.ca/eng/home/>
26. Canadian Certified Reference Materials Project: <https://natural-resources.canada.ca/mining-materials/resources/canadian-certified-reference-materials-project/price-certificates-list/8001>
